# Supplementary material for: Uncertainty Estimation of Connected Vehicle Penetration Rate
Source: Atypon-hosted journal article supplement (doi:10.1287/trsc.2023.1209), 2023-05-22
Supplement: trsc.2023.1209.sm1.pdf [file trsc.2023.1209.sm1.pdf]

## Appendix A. Proof of Proposition 1

Consider a non-empty constrained queue set (i.e.,  $\Psi \neq \emptyset$ ) with a fixed  $N$  and  $n$ , such that the total number of permutations is  $\binom{N}{n}$ . Let “1” and “0” denote a CV and a non-CV, respectively. All of these permutations can be arranged into groups according to the location of the last CV,  $l_{cv}$ , in a constrained queue, where  $l_{cv} \in [n, N]$ . For each group of permutations, the SSDPRE can be applied to obtain the corresponding  $\tilde{p}$ . Table A enumerates all of the possible groups of permutations in which the last CV is located from the last place to the  $n^{\text{th}}$  place in the sequence.

Table A Enumeration of all of the possible groups of permutations under a constant  $N$  and  $n$ .

| $l_{cv}$ | Sample Permutation                                                  | $\tilde{p}$ | Number of Permutations | Probability                       |
|----------|---------------------------------------------------------------------|-------------|------------------------|-----------------------------------|
| $N$      | $(\underbrace{0, 0, 1, 1, 0, \dots, 0, 1, 0, 0, 1}_{N-1}, 1)$       | $S(n, N)$   | $\binom{N-1}{n-1}$     | $\binom{N-1}{n-1} / \binom{N}{n}$ |
| $N-1$    | $(\underbrace{0, 0, 1, 1, 0, \dots, 0, 1, 0, 1, 0}_{N-2}, 1, 0)$    | $S(n, N-1)$ | $\binom{N-2}{n-1}$     | $\binom{N-2}{n-1} / \binom{N}{n}$ |
| $N-2$    | $(\underbrace{0, 0, 1, 0, \dots, 0, 1, 0, 1, 0, 0}_{N-3}, 1, 0, 0)$ | $S(n, N-2)$ | $\binom{N-3}{n-1}$     | $\binom{N-3}{n-1} / \binom{N}{n}$ |
| $\dots$  | $\dots$                                                             | $\dots$     | $\dots$                | $\dots$                           |
| $n$      | $(\underbrace{1, 1, 1, \dots, 1, 1}_{n-1}, 1, 0, \dots, 0)$         | $S(n, n)$   | $\binom{n-1}{n-1}$     | $\binom{n-1}{n-1} / \binom{N}{n}$ |

The mean of  $\tilde{p}$ ,  $E(\tilde{p})$ , is the average of  $\tilde{p}$  for all of the groups weighted by the probabilities, which automatically reduces to its definitional CV-to-total traffic ratio (i.e.,  $n/N$ ). Similarly, the variance of  $\tilde{p}$  is the weighted variance. Detailed proofs follow.

(1) Proof of mean

$$\text{If } n = 0, E(\tilde{p}) = 0 = \frac{n}{N}.$$

If  $n = 1$ ,

$$E(\tilde{p}) = \frac{\sum_{i=1}^N \binom{N-i}{0} S(1, N-i+1)}{\sum_{i=1}^N \binom{N-i}{0}} = \frac{\sum_{i=1}^{N-1} 0 + \sum_{i=N}^N 1}{N} = \frac{1}{N} = \frac{n}{N}. \quad (\text{A1})$$

If  $n > 1$ ,

$$E(\tilde{p}) = \frac{\sum_{i=1}^{N-n+1} \binom{N-i}{n-1} \frac{n-1}{N-i}}{\sum_{i=1}^{N-n+1} \binom{N-i}{n-1}}. \quad (\text{A2})$$

$$\text{As } \binom{N-i}{n-1} \frac{n-1}{N-i} = \binom{N-i-1}{n-2},$$

$$E(\tilde{p}) = \frac{\sum_{i=1}^{N-n+1} \binom{N-i-1}{n-2}}{\sum_{i=1}^{N-n+1} \binom{N-i}{n-1}}. \quad (\text{A3})$$

According to **Appendixes B** and **C**,  $\sum_{i=1}^{N-n+1} \binom{N-i}{n-1} = \binom{N}{n}$  and  $\sum_{i=1}^{N-n+1} \binom{N-i-1}{n-2} = \binom{N-1}{n-1}$ . Thus,

$$E(\tilde{p}) = \frac{\binom{N-1}{n-1}}{\binom{N}{n}} = \frac{n}{N}. \quad (\text{A4})$$

(2) Proof of variance

If  $n = 0$ ,  $V(\tilde{p}) = 0$ .

If  $n = 1$ ,

$$\begin{aligned} \text{Var}(\tilde{p}) &= \frac{\sum_{i=1}^{N-n+1} \binom{N-i}{n-1} (S(n, N-i+1) - E(\tilde{p}))^2}{\sum_{i=1}^{N-n+1} \binom{N-i}{n-1}} \\ &= \frac{\sum_{i=1}^{N-1} (0 - E(\tilde{p}))^2 + \sum_{i=N}^N (1 - E(\tilde{p}))^2}{N} = E(\tilde{p})^2 - \frac{2}{N} E(\tilde{p}) + \frac{1}{N}. \end{aligned} \quad (\text{A5})$$

Substituting Eq. (A4) into Eq. (A5) gives:

$$\text{Var}(\tilde{p}) = \frac{n^2 - 2n + N}{N^2}. \quad (\text{A6})$$

If  $n > 1$ ,

$$\text{Var}(\tilde{p}) = \frac{\sum_{i=1}^{N-n+1} \binom{N-i}{n-1} (S(n, N-i+1) - E(\tilde{p}))^2}{\sum_{i=1}^{N-n+1} \binom{N-i}{n-1}} = \frac{\sum_{i=1}^{N-n+1} \binom{N-i}{n-1} \frac{(n-1)^2}{N-i}}{\sum_{i=1}^{N-n+1} \binom{N-i}{n-1}} - E(\tilde{p})^2. \quad (\text{A7})$$

Substituting  $\sum_{i=1}^{N-n+1} \binom{N-i}{n-1} = \binom{N}{n}$  from **Appendix B**,  $\binom{N-i}{n-1} \frac{n-1}{N-i} = \binom{N-i-1}{n-2}$ , and Eq. (A4) into Eq. (A7)

gives:

$$\text{Var}(\tilde{p}) = \frac{\sum_{i=1}^{N-n+1} \frac{n-1}{N-i} \binom{N-i-1}{n-2}}{\binom{N}{n}} - \frac{n^2}{N^2}. \quad (\text{A8})$$

**Q.E.D.**

**Appendix B. Derivation of  $\sum_{i=1}^{N-n+1} \binom{N-i}{n-1} = \binom{N}{n}$**

$$\sum_{i=1}^{N-n+1} \binom{N-i}{n-1} = \binom{N-1}{n-1} + \binom{N-2}{n-1} + \binom{N-3}{n-1} + \cdots + \binom{n+1}{n-1} + \binom{n}{n-1} + \binom{n-1}{n-1}. \quad (\text{B1})$$

As  $\binom{n-1}{n-1} = \binom{n}{n}$  and  $\binom{n}{r} + \binom{n}{r-1} = \binom{n+1}{r}$ ,

$$\begin{aligned} \sum_{i=1}^{N-n+1} \binom{N-i}{n-1} &= \binom{N-1}{n-1} + \binom{N-2}{n-1} + \binom{N-3}{n-1} + \cdots + \binom{n+1}{n-1} + \binom{n}{n-1} + \binom{n}{n} \\ &= \binom{N-1}{n-1} + \binom{N-2}{n-1} + \binom{N-3}{n-1} + \cdots + \binom{n+1}{n-1} + \binom{n+1}{n} \end{aligned} \quad (\text{B2})$$

...

$$= \binom{N}{n}.$$

### Appendix C. Derivation of $\sum_{i=1}^{N-n+1} \binom{N-i-1}{n-2}$

$$\sum_{i=1}^{N-n+1} \binom{N-i-1}{n-2} = \binom{N-2}{n-2} + \binom{N-3}{n-2} + \dots + \binom{n}{n-2} + \binom{n-1}{n-2} + \binom{n-2}{n-2}. \quad (C1)$$

As  $\binom{n-2}{n-2} = \binom{n-1}{n-1}$  and  $\binom{n}{r} + \binom{n}{r-1} = \binom{n+1}{r}$ ,

$$\begin{aligned} \sum_{i=1}^{N-n+1} \binom{N-i-1}{n-2} &= \binom{N-2}{n-2} + \binom{N-3}{n-2} + \dots + \binom{n}{n-2} + \binom{n-1}{n-2} + \binom{n-1}{n-1} \\ &= \binom{N-2}{n-2} + \binom{N-2}{n-2} + \binom{N-3}{n-2} + \dots + \binom{n}{n-2} + \binom{n}{n-1} \end{aligned} \quad (C2)$$

...

$$= \binom{N-1}{n-1}.$$

### Appendix D. Vertical queue experiments with Proposition 1

To validate and demonstrate the superiority of **Proposition 1**, a series of comprehensive simulation experiments based on the vertical queue assumption were conducted. Various combinations of fixed  $N$  and  $n$  were considered. The variability solely arose from the permutations of the stopped vehicles. Table D presents the simulation results. The means and variances for all of the cases based on **Proposition 1** were identical to the ground truths obtained via enumeration, demonstrating the accuracy of **Proposition 1**. Moreover, the negligible computation time of **Proposition 1** demonstrated its efficiency.

Table D Results of vertical queue experiments with Proposition 1.

| $N$ | $n$ | Method        | Mean | Variance | Computation time for mean (s) | Computation time for variance (s) |
|-----|-----|---------------|------|----------|-------------------------------|-----------------------------------|
| 10  | 1   | Ground truth  | 0.1  | 0.09000  | 0.001                         | 0.002                             |
|     |     | Proposition 1 | 0.1  | 0.09000  | 0                             | 0                                 |
|     | 3   | Ground truth  | 0.3  | 0.01285  | 0.002                         | 0.002                             |
|     |     | Proposition 1 | 0.3  | 0.01285  | 0                             | 0                                 |
|     | 5   | Ground truth  | 0.5  | 0.00668  | 0.001                         | 0.002                             |
|     |     | Proposition 1 | 0.5  | 0.00668  | 0                             | 0                                 |
|     | 7   | Ground truth  | 0.7  | 0.00355  | 0.002                         | 0.002                             |
|     |     | Proposition 1 | 0.7  | 0.00355  | 0                             | 0                                 |
|     | 9   | Ground truth  | 0.9  | 0.00111  | 0.001                         | 0.001                             |
|     |     | Proposition 1 | 0.9  | 0.00111  | 0                             | 0                                 |
| 20  | 2   | Ground truth  | 0.1  | 0.00867  | 0.002                         | 0.002                             |
|     |     | Proposition 1 | 0.1  | 0.00867  | 0                             | 0                                 |
|     | 6   | Ground truth  | 0.3  | 0.00237  | 0.196                         | 0.197                             |
|     |     | Proposition 1 | 0.3  | 0.00237  | 0                             | 0                                 |
|     | 10  | Ground truth  | 0.5  | 0.00145  | 0.977                         | 0.978                             |
|     |     | Proposition 1 | 0.5  | 0.00145  | 0                             | 0                                 |

|    |   |               |     |         |         |         |
|----|---|---------------|-----|---------|---------|---------|
| 14 |   | Ground truth  | 0.7 | 0.00082 | 0.212   | 0.212   |
|    |   | Proposition 1 | 0.7 | 0.00082 | 0       | 0       |
| 18 |   | Ground truth  | 0.9 | 0.00026 | 0.001   | 0.001   |
|    |   | Proposition 1 | 0.9 | 0.00026 | 0       | 0       |
| 30 | 3 | Ground truth  | 0.1 | 0.00233 | 0.025   | 0.025   |
|    |   | Proposition 1 | 0.1 | 0.00233 | 0       | 0       |
|    | 9 | Ground truth  | 0.3 | 0.00095 | 73.471  | 73.527  |
|    |   | Proposition 1 | 0.3 | 0.00095 | 0       | 0       |
| 15 |   | Ground truth  | 0.5 | 0.00061 | 943.923 | 944.490 |
|    |   | Proposition 1 | 0.5 | 0.00061 | 0       | 0       |
| 21 |   | Ground truth  | 0.7 | 0.00035 | 82.853  | 82.906  |
|    |   | Proposition 1 | 0.7 | 0.00035 | 0       | 0       |
| 27 |   | Ground truth  | 0.9 | 0.00012 | 0.028   | 0.028   |
|    |   | Proposition 1 | 0.9 | 0.00012 | 0       | 0       |

## Appendix E. Proof of Proposition 2

Consider a non-empty constrained queue set (i.e.,  $\Psi \neq \emptyset$ ) with a fixed  $N$  and a varying  $n$  following  $B(N, p)$ , where  $n$  in each constrained queue varies and  $n \in [0, N]$ . It follows that the permutations of the constrained queues can be arranged into two levels. The first level contains all of the permutations grouped in terms of their value of  $n$  in the constrained queues. The second level contains a fixed  $N$  and  $n$  under each  $n$ , and thus **Proposition 1** can be employed. Similar to **Appendix A**, permutations in each group can be further arranged into sub-groups in terms of the location of the last CV,  $l_{cv}$ , in the constrained queues and the SSDPRE can be applied to each sub-group to obtain the corresponding  $\tilde{p}$ . Table E enumerates all of the possible groups and sub-groups of permutations.

Table E Enumeration of all of the possible permutations under a constant  $N$  and a varying  $n$ .

| $n$ | First level of $n$             |                                                | Second level of $l_{cv}$ |                                                                  |
|-----|--------------------------------|------------------------------------------------|--------------------------|------------------------------------------------------------------|
|     | Probability                    |                                                | $\tilde{p}$              | Probability                                                      |
| 0   | $\binom{N}{0} p^0 (1-p)^N$     |                                                | 0                        | 1                                                                |
| 1   | $\binom{N}{1} p^1 (1-p)^{N-1}$ | $S(1, N-j+1), \forall j = 1, 2, 3, \dots, N$   |                          | $\binom{N-j}{0} / \binom{N}{1}, \forall j = 1, 2, 3, \dots, N$   |
| 2   | $\binom{N}{2} p^2 (1-p)^{N-2}$ | $S(2, N-j+1), \forall j = 1, 2, 3, \dots, N-1$ |                          | $\binom{N-j}{1} / \binom{N}{2}, \forall j = 1, 2, 3, \dots, N-1$ |
| ... | ...                            | ...                                            | ...                      | ...                                                              |
| $N$ | $\binom{N}{N} p^N (1-p)^0$     | $S(N, N-j+1), \forall j = 1$                   |                          | $\binom{N-j}{N-1} / \binom{N}{N}, \forall j = 1$                 |

(1) Proof of mean

$$E(\tilde{p}) = 1 \cdot \binom{N}{0} p^0 (1-p)^N \cdot 0 + \sum_{i=1}^N \sum_{j=1}^{N-i+1} \left[ \frac{\binom{N-j}{i-1}}{\binom{N}{i}} \right] S(i, N-j+1) \binom{N}{i} p^i (1-p)^{N-i}$$

$$\begin{aligned}
&= \sum_{i=1}^1 \sum_{j=1}^{N-i+1} \binom{N-j}{i-1} p^i (1-p)^{N-i} S(i, N-j+1) \\
&+ \sum_{i=2}^N \sum_{j=1}^{N-i+1} \binom{N-j}{i-1} p^i (1-p)^{N-i} S(i, N-j+1).
\end{aligned} \tag{E1}$$

Let  $\sum_{i=1}^1 \sum_{j=1}^{N-i+1} \binom{N-j}{i-1} p^i (1-p)^{N-i} S(i, N-j+1)$  and  $\sum_{i=2}^N \sum_{j=1}^{N-i+1} \binom{N-j}{i-1} p^i (1-p)^{N-i} S(i, N-j+1)$  be  $A$  and  $B$ , respectively. According to **Appendix F**,  $A = p(1-p)^{N-1}$  and  $B = p - p(1-p)^{N-1}$ .

Therefore,

$$E(\tilde{p}) = A + B = p(1-p)^{N-1} + p - p(1-p)^{N-1} = p = n/N. \tag{E2}$$

(2) Proof of variance

$$\begin{aligned}
\text{Var}(\tilde{p}) &= \binom{N}{0} p^0 (1-p)^N \cdot 1 [0 - E(\tilde{p})]^2 \\
&+ \sum_{i=1}^N \sum_{j=1}^{N-i+1} \frac{\binom{N-j}{i-1}}{\binom{N}{i}} \binom{N}{i} p^i (1-p)^{N-i} [S(i, N-j+1) - E(\tilde{p})]^2 \\
&= (1-p)^N E(\tilde{p})^2 + \sum_{j=1}^{N-1} \binom{N-j}{1} p^1 (1-p)^{N-1} [S(1, N-j+1) - E(\tilde{p})]^2 \\
&+ \sum_{i=2}^N \sum_{j=1}^{N-i+1} \binom{N-j}{i-1} p^i (1-p)^{N-i} [S(i, N-j+1) - E(\tilde{p})]^2.
\end{aligned} \tag{E3}$$

Let  $C = \sum_{i=1}^1 \sum_{j=1}^{N-i+1} \binom{N-j}{i-1} p^i (1-p)^{N-i} [S(i, N-j+1) - E(\tilde{p})]^2$  and  $D = \sum_{i=2}^N \sum_{j=1}^{N-i+1} \binom{N-j}{i-1} p^i (1-p)^{N-i} [S(i, N-j+1) - E(\tilde{p})]^2$ , respectively. Thus,

$$\text{Var}(\tilde{p}) = (1-p)^N E(\tilde{p})^2 + C \quad \text{if } N = 1, \tag{E4}$$

$$\text{Var}(\tilde{p}) = (1-p)^N E(\tilde{p})^2 + C + D \quad \text{if } N > 1. \tag{E5}$$

According to **Appendix G**,  $C = p(1-p)^{N-1} [NE(\tilde{p})^2 - 2E(\tilde{p}) + 1]$  and  $D = \sum_{i=2}^N p^i (1-p)^{N-i} \sum_{j=1}^{N-i+1} \binom{N-j-1}{i-2} \frac{i-1}{N-j} - 2E(\tilde{p})p[1 - (1-p)^{N-1}] + E(\tilde{p})^2[1 - (1-p)^N - Np(1-p)^{N-1}]$ . By

substituting  $C, D$ , Eq. (3b), and Eq. (E2) into Eq. (E4) and Eq. (E5),

$$\text{Var}(\tilde{p}) = p(1-p) \quad \text{if } N = 1, \tag{E6}$$

$$\text{Var}(\tilde{p}) = \sum_{i=2}^N p^i (1-p)^{N-i} \left[ V_1(i, N) + \left(\frac{i}{N}\right)^2 \right] \binom{N}{i} - p^2 + p(1-p)^{N-1} \quad \text{if } N > 1. \tag{E7}$$

**Q.E.D.**

## Appendix F. Derivations of A and B

For  $A$ ,

$$A = \sum_{i=1}^1 \sum_{j=1}^{N-i+1} \binom{N-j}{i-1} p^i (1-p)^{N-i} S(i, N-j+1). \tag{F1}$$

$$\begin{aligned}
&= \sum_{j=1}^N \binom{N-j}{0} p^1 (1-p)^{N-1} S(1, N-j+1) \\
&= \sum_{j=1}^{N-1} \binom{N-j}{0} p^1 (1-p)^{-1} \cdot 0 + \sum_{j=N}^N \binom{N-j}{0} p^1 (1-p)^{N-1} \cdot 1 \\
&= 0 + p^1 (1-p)^{N-1} = p^1 (1-p)^{N-1}.
\end{aligned}$$

For  $B$ ,

$$\begin{aligned}
B &= \sum_{i=2}^N \sum_{j=1}^{N-i+1} \binom{N-j}{i-1} p^i (1-p)^{N-i} S(i, N-j+1) \\
&= \sum_{i=2}^N \sum_{j=1}^{N-i+1} \binom{N-j}{i-1} \frac{i-1}{N-j} p^i (1-p)^{N-i}.
\end{aligned} \tag{F2}$$

Given that  $\binom{N-j}{i-1} \frac{i-1}{N-j} = \binom{N-j-1}{i-2}$ , Eq. (F2) can be rewritten as

$$B = \sum_{i=2}^N \sum_{j=1}^{N-i+1} \binom{N-j-1}{i-2} p^i (1-p)^{N-i}. \tag{F3}$$

As

$$\begin{aligned}
\sum_{j=1}^{N-i+1} \binom{N-j-1}{i-2} &= \binom{N-2}{i-2} + \binom{N-3}{i-2} + \binom{N-4}{i-2} + \dots + \binom{i-1}{i-2} + \binom{i-2}{i-2} \\
&= \binom{N-2}{i-2} + \binom{N-3}{i-2} + \binom{N-4}{i-2} + \dots + \binom{i-1}{i-2} + \binom{i-1}{i-1} \\
&= \binom{N-2}{i-2} + \binom{N-3}{i-2} + \binom{N-4}{i-2} + \dots + \binom{i}{i-1} \\
&\dots \\
&= \binom{N-1}{i-1},
\end{aligned} \tag{F4}$$

and thus substituting Eq. (F4) into Eq. (F3) affords

$$B = \sum_{i=2}^N \binom{N-1}{i-1} p^i (1-p)^{N-i}. \tag{F5}$$

As  $\binom{N-1}{i-1} = \binom{N}{i} \frac{i}{N}$ ,

$$\begin{aligned}
B &= \frac{1}{N} \sum_{i=2}^N i \binom{N}{i} p^i (1-p)^{N-i} \\
&= \frac{1}{N} [\sum_{i=0}^N i \binom{N}{i} p^i (1-p)^{N-i} - 0 - (1 \binom{N}{1} p^1 (1-p)^{N-1})] \\
&= \frac{1}{N} [(E(n) - Np(1-p)^{N-1})] = p - p(1-p)^{N-1}.
\end{aligned} \tag{F6}$$

## Appendix G. Derivations of $C$ and $D$

For  $C$ ,

$$\begin{aligned}
C &= \sum_{i=1}^1 \sum_{j=1}^{N-i+1} \binom{N-j}{i-1} p^i (1-p)^{N-i} [S(i, N-j+1) - E(\tilde{p})]^2 \\
&= p(1-p)^{N-1} [NE(\tilde{p})^2 - 2E(\tilde{p}) + 1].
\end{aligned} \tag{G1}$$

For  $D$ ,

$$\begin{aligned} D &= \sum_{i=2}^N \sum_{j=1}^{N-i+1} \binom{N-j}{i-1} p^i (1-p)^{N-i} [S(i, N-j+1) - E(\tilde{p})]^2 \\ &= \sum_{i=2}^N p^i (1-p)^{N-i} \sum_{j=1}^{N-i+1} \binom{N-j}{i-1} \left[ \frac{i-1}{N-j} - E(\tilde{p}) \right]^2. \end{aligned} \quad (\text{G2})$$

Let  $F = \sum_{j=1}^{N-i+1} \binom{N-j}{i-1} \left[ \frac{i-1}{N-j} - E(\tilde{p}) \right]^2$ , thus,

$$F = \sum_{j=1}^{N-i+1} \binom{N-j}{i-1} \frac{i-1}{N-j} - 2E(\tilde{p}) \sum_{j=1}^{N-i+1} \binom{N-j}{i-1} \frac{i-1}{N-j} + E(\tilde{p})^2 \sum_{j=1}^{N-i+1} \binom{N-j}{i-1}. \quad (\text{G3})$$

As  $\binom{N-j}{i-1} \frac{i-1}{N-j} = \binom{N-j-1}{i-2}$ ,

$$F = \sum_{j=1}^{N-i+1} \binom{N-j-1}{i-2} \frac{i-1}{N-j} - 2E(\tilde{p}) \sum_{j=1}^{N-i+1} \binom{N-j-1}{i-2} + E(\tilde{p})^2 \sum_{j=1}^{N-i+1} \binom{N-j}{i-1}. \quad (\text{G4})$$

Therefore, by substituting Eq. (B2) and Eq. (F4) into Eq. (G4), it is found that

$$F = \sum_{j=1}^{N-i+1} \binom{N-j-1}{i-2} \frac{i-1}{N-j} - 2E(\tilde{p}) \binom{N-1}{i-1} + E(\tilde{p})^2 \binom{N}{i}. \quad (\text{G5})$$

Thus,  $D$  can be rewritten as

$$\begin{aligned} D &= \sum_{i=2}^N p^i (1-p)^{N-i} F = \sum_{i=2}^N p^i (1-p)^{N-i} \sum_{j=1}^{N-i+1} \binom{N-j-1}{i-2} \frac{i-1}{N-j} \\ &\quad - \sum_{i=2}^N p^i (1-p)^{N-i} 2E(\tilde{p}) \binom{N-1}{i-1} + \sum_{i=2}^N p^i (1-p)^{N-i} E(\tilde{p})^2 \binom{N}{i}. \end{aligned} \quad (\text{G6})$$

Let  $G = \sum_{i=2}^N p^i (1-p)^{N-i} 2E(\tilde{p}) \binom{N-1}{i-1}$  and  $H = \sum_{i=2}^N p^i (1-p)^{N-i} E(\tilde{p})^2 \binom{N}{i}$ . According to Eqs. (F5) and (F6),

$$G = \sum_{i=2}^N p^i (1-p)^{N-i} 2E(\tilde{p}) \binom{N-1}{i-1} = 2E(\tilde{p}) p [1 - (1-p)^{N-1}]. \quad (\text{G7})$$

For  $H$ ,

$$\begin{aligned} H &= \sum_{i=2}^N p^i (1-p)^{N-i} E(\tilde{p})^2 \binom{N}{i} \\ &= E(\tilde{p})^2 [1 - (1-p)^N - Np(1-p)^{N-1}]. \end{aligned} \quad (\text{G8})$$

Thus,

$$\begin{aligned} D &= \sum_{i=2}^N p^i (1-p)^{N-i} \sum_{j=1}^{N-i+1} \binom{N-j-1}{i-2} \frac{i-1}{N-j} - 2E(\tilde{p}) p [1 - (1-p)^{N-1}] \\ &\quad + E(\tilde{p})^2 [1 - (1-p)^N - Np(1-p)^{N-1}]. \end{aligned} \quad (\text{G9})$$

## Appendix H. Vertical queue experiments using Proposition 2

To validate and demonstrate the superiority of **Proposition 2**, a series of comprehensive simulation experiments based on the vertical queue assumption were conducted. Various combinations

of fixed  $N$  and varying  $n \sim B(N, p)$  were considered. In this context, variability originated from the permutations of the stopped vehicles and  $n$ . First, for each chosen  $N$ , all of the possible  $n$  were enumerated. Then, under each given  $n$ , both  $N$  and  $n$  were fixed and the problem was reduced to the conditions stated in **Proposition 1**. Thus, all of the permutations could be enumerated and the corresponding  $\tilde{p}$  were evaluated using the SSDPRE. Table H reports the simulation results. The means and variances of all of the cases based on **Proposition 2** were identical to the ground truths obtained via enumeration, demonstrating the accuracy of **Proposition 2**. Moreover, the negligible computation time demonstrated the efficiency of **Proposition 2**.

Table H Results of vertical queue experiments using Proposition 2.

| $N$ | $p$ | Method        | Mean          | Variance | Computation time for mean (s) | Computation time for variance (s) |           |
|-----|-----|---------------|---------------|----------|-------------------------------|-----------------------------------|-----------|
| 10  | 0.1 | Ground truth  | 0.1           | 0.04915  | 0.013                         | 0.013                             |           |
|     |     | Proposition 2 | 0.1           | 0.04915  | 0                             | 0                                 |           |
|     | 0.3 | Ground truth  | 0.3           | 0.04337  | 0.011                         | 0.011                             |           |
|     |     | Proposition 2 | 0.3           | 0.04337  | 0                             | 0                                 |           |
|     | 0.5 | Ground truth  | 0.5           | 0.03342  | 0.011                         | 0.012                             |           |
|     |     | Proposition 2 | 0.5           | 0.03342  | 0                             | 0                                 |           |
|     | 0.7 | Ground truth  | 0.7           | 0.02479  | 0.012                         | 0.012                             |           |
|     |     | Proposition 2 | 0.7           | 0.02479  | 0                             | 0                                 |           |
|     | 0.9 | Ground truth  | 0.9           | 0.01014  | 0.012                         | 0.012                             |           |
|     |     | Proposition 2 | 0.9           | 0.01014  | 0                             | 0                                 |           |
|     | 20  | 0.1           | Ground truth  | 0.1      | 0.02110                       | 11.052                            | 11.131    |
|     |     |               | Proposition 2 | 0.1      | 0.02110                       | 0                                 | 0.001     |
| 0.3 |     | Ground truth  | 0.3           | 0.01351  | 11.126                        | 11.210                            |           |
|     |     | Proposition 2 | 0.3           | 0.01351  | 0                             | 0.001                             |           |
| 0.5 |     | Ground truth  | 0.5           | 0.01400  | 11.082                        | 11.170                            |           |
|     |     | Proposition 2 | 0.5           | 0.01400  | 0                             | 0.001                             |           |
| 0.7 |     | Ground truth  | 0.7           | 0.01133  | 10.968                        | 11.051                            |           |
|     |     | Proposition 2 | 0.7           | 0.01133  | 0                             | 0.001                             |           |
| 0.9 |     | Ground truth  | 0.9           | 0.00477  | 11.046                        | 11.133                            |           |
|     |     | Proposition 2 | 0.9           | 0.00477  | 0                             | 0.001                             |           |
| 30  |     | 0.1           | Ground truth  | 0.1      | 0.00970                       | 11160.706                         | 11617.295 |
|     |     |               | Proposition 2 | 0.1      | 0.00970                       | 0                                 | 0.002     |
|     | 0.3 | Ground truth  | 0.3           | 0.00801  | 11163.901                     | 11618.435                         |           |
|     |     | Proposition 2 | 0.3           | 0.00801  | 0                             | 0.002                             |           |
|     | 0.5 | Ground truth  | 0.5           | 0.00895  | 11161.346                     | 11617.299                         |           |
|     |     | Proposition 2 | 0.5           | 0.00895  | 0                             | 0.002                             |           |
|     | 0.7 | Ground truth  | 0.7           | 0.00736  | 11160.903                     | 11616.992                         |           |
|     |     | Proposition 2 | 0.7           | 0.00736  | 0                             | 0.002                             |           |
|     | 0.9 | Ground truth  | 0.9           | 0.00312  | 11162.348                     | 11618.472                         |           |
|     |     | Proposition 2 | 0.9           | 0.00312  | 0                             | 0.002                             |           |

## Appendix I. Proof of Corollary 2

The detailed proof of the joint probability distribution of observing any combination of  $n$  and  $\tilde{N}$  is provided in this appendix. If  $n = 0$ ,  $\tilde{N}$  must be 0 and  $N$  can be either 0,  $k, \forall k \in \mathbb{N}^+$ . When  $N = 0$ , the probability for this case is  $\pi_0$ . When  $N = k, \forall k \in \mathbb{N}^+$ , the probability of observing  $k$  vehicle is  $\pi_k$  and the probability of observing  $k$  non-CVs is  $(1-p)^k$ . Thus, the probability for this case is  $\pi_k(1-p)^k$ . Therefore, the probability of observing  $n = 0$  and  $\tilde{N} = 0$  is given by Eq. (I1):

$$P(n = 0, \tilde{N} = 0) = \pi_0 + \sum_{z=1}^k \pi_z (1-p)^z. \quad (\text{I1})$$

If  $n > 0, \tilde{N} > 0. \forall i, j = 1, 2, \dots, k$ , where  $j \geq i$ ,

$$P(n = i, \tilde{N} = j) = \sum_{z=j}^k \pi_z \binom{j-1}{i-1} p^i (1-p)^{z-i}. \quad (\text{I2})$$

Therefore, the joint probability distribution of observing any combination of  $n$  and  $\tilde{N}$  is given by Eq. (G3):

$$P(n = i, \tilde{N} = j) = \begin{cases} \pi_0 + \sum_{z=1}^k \pi_z (1-p)^z, & i = 0, j = 0 \\ \sum_{z=j}^k \pi_z \binom{j-1}{i-1} p^i (1-p)^{z-i}, & \forall i, j = 1, 2, \dots, k, j \geq i \end{cases}, \quad (\text{I3})$$

where  $\pi_i = P(N = i), \forall i \in \mathbb{N}$ .

**Q.E.D.**

## Appendix J. Vertical queue experiments using Proposition 3

Comprehensive simulation experiments under the vertical queue assumption were conducted to examine the performance of **Proposition 3**. By assuming  $N$  follows a Poisson distribution,  $Pois(\lambda)$ , **Corollary 1** was obtained. Various combinations of  $\lambda$  and  $p$  were considered. In this case, variability stemmed from  $N$ ,  $n$ , and the permutation of the stopped vehicles. As  $N \sim Pois(\lambda)$ , there were infinitely many possible outcomes for  $N$  and it was not possible to enumerate all possible permutations. Thus, to estimate the mean and variance of  $\tilde{p}$ , random sampling of the possible permutations based on the selected  $Pois(\lambda)$  and  $B(N, p)$  with three selected sample sizes (i.e., 100,000, 1,000,000 and 10,000,000) was conducted, which provided useful references for the validation of **Corollary 1**. Various ranges of

constrained queue length  $k$  were considered for the validation based on **Corollary 1**. Table J presents the results of the experiments on **Corollary 1**. The results show that estimates based on **Corollary 1** (or **Proposition 3**) were more accurate and computationally efficient than those obtained by random sampling.

Table J Results of vertical queue experiments using Corollary 1.

| $\lambda$   | $p$         | Method      | $k/\#$ of samples | Mean       | Variance | Computing time for mean (s) | Computing time for variance (s) |         |
|-------------|-------------|-------------|-------------------|------------|----------|-----------------------------|---------------------------------|---------|
| 10          | 0.1         | Sampling    | 100,000           | 0.100      | 0.04870  | 3.539                       | 3.546                           |         |
|             |             |             | 1,000,000         | 0.100      | 0.04875  | 35.243                      | 35.303                          |         |
|             |             |             | 10,000,000        | 0.100      | 0.04892  | 350.512                     | 351.087                         |         |
|             |             | Corollary 1 | [0, 20]           | 0.1        | 0.05068  | 0                           | 0.010                           |         |
|             |             |             | [0, 30]           | 0.1        | 0.05071  | 0                           | 0.025                           |         |
|             |             |             | [0, 40]           | 0.1        | 0.05071  | 0                           | 0.054                           |         |
|             |             | 0.3         | Sampling          | 100,000    | 0.300    | 0.05057                     | 3.653                           | 3.658   |
|             |             |             |                   | 1,000,000  | 0.300    | 0.05069                     | 36.786                          | 36.829  |
|             |             |             |                   | 10,000,000 | 0.300    | 0.05073                     | 367.545                         | 367.976 |
|             | Corollary 1 |             | [0, 20]           | 0.3        | 0.05304  | 0                           | 0.010                           |         |
|             |             |             | [0, 30]           | 0.3        | 0.05306  | 0                           | 0.025                           |         |
|             |             |             | [0, 40]           | 0.3        | 0.05306  | 0                           | 0.053                           |         |
|             | 0.5         |             | Sampling          | 100,000    | 0.500    | 0.04128                     | 3.680                           | 3.683   |
|             |             |             |                   | 1,000,000  | 0.500    | 0.04127                     | 37.309                          | 37.347  |
|             |             |             |                   | 10,000,000 | 0.500    | 0.04129                     | 369.133                         | 369.505 |
|             |             | Corollary 1 | [0, 20]           | 0.5        | 0.04277  | 0                           | 0.009                           |         |
|             |             |             | [0, 30]           | 0.5        | 0.04279  | 0                           | 0.026                           |         |
|             |             |             | [0, 40]           | 0.5        | 0.04279  | 0                           | 0.055                           |         |
|             |             | 0.7         | Sampling          | 100,000    | 0.701    | 0.02949                     | 3.692                           | 3.696   |
|             |             |             |                   | 1,000,000  | 0.700    | 0.02957                     | 37.303                          | 37.340  |
|             |             |             |                   | 10,000,000 | 0.700    | 0.02945                     | 374.259                         | 374.627 |
|             | Corollary 1 |             | [0, 20]           | 0.7        | 0.03041  | 0                           | 0.010                           |         |
|             |             |             | [0, 30]           | 0.7        | 0.03042  | 0                           | 0.026                           |         |
|             |             |             | [0, 40]           | 0.7        | 0.03042  | 0                           | 0.054                           |         |
| 0.9         | Sampling    |             | 100,000           | 0.900      | 0.01169  | 3.681                       | 3.684                           |         |
|             |             |             | 1,000,000         | 0.900      | 0.01173  | 37.823                      | 37.858                          |         |
|             |             |             | 10,000,000        | 0.900      | 0.01172  | 377.504                     | 377.864                         |         |
|             | Corollary 1 | [0, 20]     | 0.9               | 0.01207    | 0        | 0.010                       |                                 |         |
|             |             | [0, 30]     | 0.9               | 0.01208    | 0        | 0.027                       |                                 |         |
|             |             | [0, 40]     | 0.9               | 0.01208    | 0        | 0.054                       |                                 |         |
|             | 20          | 0.1         | Sampling          | 100,000    | 0.099    | 0.02153                     | 4.243                           | 4.248   |
|             |             |             |                   | 1,000,000  | 0.100    | 0.02202                     | 43.884                          | 43.937  |
|             |             |             |                   | 10,000,000 | 0.100    | 0.02205                     | 430.435                         | 430.954 |
| Corollary 1 |             |             | [10, 30]          | 0.1        | 0.02229  | 0                           | 0.024                           |         |
|             |             |             | [0, 40]           | 0.1        | 0.02268  | 0                           | 0.053                           |         |
|             |             |             | [0, 50]           | 0.1        | 0.02268  | 0                           | 0.098                           |         |
| 0.3         |             |             | Sampling          | 100,000    | 0.300    | 0.01527                     | 4.350                           | 4.353   |
|             |             |             |                   | 1,000,000  | 0.300    | 0.01505                     | 43.430                          | 43.465  |
|             |             |             |                   | 10,000,000 | 0.300    | 0.01502                     | 442.631                         | 443.001 |
|             |             | Corollary 1 | [10, 30]          | 0.3        | 0.01496  | 0                           | 0.024                           |         |
|             |             |             | [0, 40]           | 0.3        | 0.01536  | 0                           | 0.054                           |         |
|             |             |             | [0, 50]           | 0.3        | 0.01536  | 0                           | 0.098                           |         |
|             |             | 0.5         | Sampling          | 100,000    | 0.499    | 0.01475                     | 4.331                           | 4.334   |
|             |             |             |                   | 1,000,000  | 0.500    | 0.01478                     | 43.794                          | 43.831  |

|     |     |             |            |       |         |         |         |
|-----|-----|-------------|------------|-------|---------|---------|---------|
|     |     |             | 10,000,000 | 0.500 | 0.01481 | 434.439 | 434.803 |
|     |     | Corollary 1 | [10, 30]   | 0.5   | 0.01477 | 0       | 0.025   |
|     |     |             | [0, 40]    | 0.5   | 0.01511 | 0       | 0.055   |
|     |     |             | [0, 50]    | 0.5   | 0.01511 | 0       | 0.098   |
| 0.7 |     | Sampling    | 100,000    | 0.700 | 0.01190 | 4.365   | 4.368   |
|     |     |             | 1,000,000  | 0.700 | 0.01185 | 44.013  | 44.050  |
|     |     |             | 10,000,000 | 0.700 | 0.01186 | 438.506 | 438.864 |
|     |     | Corollary 1 | [10, 30]   | 0.7   | 0.01185 | 0       | 0.024   |
|     |     |             | [0, 40]    | 0.7   | 0.01210 | 0       | 0.055   |
|     |     |             | [0, 50]    | 0.7   | 0.01210 | 0       | 0.099   |
| 0.9 |     | Sampling    | 100,000    | 0.900 | 0.00502 | 4.339   | 4.343   |
|     |     |             | 1,000,000  | 0.900 | 0.00499 | 43.706  | 43.743  |
|     |     |             | 10,000,000 | 0.900 | 0.00497 | 432.398 | 432.579 |
|     |     | Corollary 1 | [10, 30]   | 0.9   | 0.00497 | 0       | 0.024   |
|     |     |             | [0, 40]    | 0.9   | 0.00507 | 0       | 0.054   |
|     |     |             | [0, 50]    | 0.9   | 0.00507 | 0       | 0.099   |
| 30  | 0.1 | Sampling    | 100,000    | 0.100 | 0.01062 | 4.793   | 4.798   |
|     |     |             | 1,000,000  | 0.100 | 0.01042 | 47.707  | 47.752  |
|     |     |             | 10,000,000 | 0.100 | 0.01041 | 482.325 | 482.749 |
|     |     | Corollary 1 | [20, 40]   | 0.1   | 0.00997 | 0       | 0.046   |
|     |     |             | [10, 50]   | 0.1   | 0.01067 | 0       | 0.098   |
|     |     |             | [0, 60]    | 0.1   | 0.01067 | 0       | 0.174   |
| 0.3 |     | Sampling    | 100,000    | 0.300 | 0.00834 | 4.804   | 4.808   |
|     |     |             | 1,000,000  | 0.300 | 0.00834 | 48.285  | 48.323  |
|     |     |             | 10,000,000 | 0.300 | 0.00834 | 483.857 | 484.219 |
|     |     | Corollary 1 | [20, 40]   | 0.3   | 0.00793 | 0       | 0.046   |
|     |     |             | [10, 50]   | 0.3   | 0.00846 | 0       | 0.097   |
|     |     |             | [0, 60]    | 0.3   | 0.00847 | 0       | 0.163   |
| 0.5 |     | Sampling    | 100,000    | 0.500 | 0.00920 | 4.814   | 4.818   |
|     |     |             | 1,000,000  | 0.500 | 0.00920 | 48.994  | 49.031  |
|     |     |             | 10,000,000 | 0.500 | 0.00921 | 487.016 | 487.387 |
|     |     | Corollary 1 | [20, 40]   | 0.5   | 0.00878 | 0       | 0.045   |
|     |     |             | [10, 50]   | 0.5   | 0.00933 | 0       | 0.096   |
|     |     |             | [0, 60]    | 0.5   | 0.00934 | 0       | 0.162   |
| 0.7 |     | Sampling    | 100,000    | 0.700 | 0.00753 | 4.826   | 4.830   |
|     |     |             | 1,000,000  | 0.700 | 0.00752 | 48.148  | 48.183  |
|     |     |             | 10,000,000 | 0.700 | 0.00755 | 486.355 | 486.721 |
|     |     | Corollary 1 | [20, 40]   | 0.7   | 0.00720 | 0       | 0.047   |
|     |     |             | [10, 50]   | 0.7   | 0.00765 | 0       | 0.098   |
|     |     |             | [0, 60]    | 0.7   | 0.00765 | 0       | 0.164   |
| 0.9 |     | Sampling    | 100,000    | 0.900 | 0.00321 | 4.784   | 4.788   |
|     |     |             | 1,000,000  | 0.900 | 0.00320 | 48.222  | 48.258  |
|     |     |             | 10,000,000 | 0.900 | 0.00320 | 485.871 | 486.233 |
|     |     | Corollary 1 | [20, 40]   | 0.9   | 0.00305 | 0       | 0.046   |
|     |     |             | [10, 50]   | 0.9   | 0.00324 | 0       | 0.097   |
|     |     |             | [0, 60]    | 0.9   | 0.00324 | 0       | 0.163   |

## Appendix K. Computation costs of Propositions 4 and 5

Comprehensive simulation experiments based on the vertical queue assumption were conducted to compare the computation efficiency of **Propositions 4** and **5**. Various combinations of red periods, V/C ratios, and ranges of constrained queue length  $k$  (i.e.,  $k \in [0, 10]$ ,  $k \in [0, 13]$ , and  $k \in [0, 15]$ )

were considered. The constrained queue length distributions obtained based on **Propositions 4** and **5** were identical. However, the results clearly demonstrated that **Proposition 5** is much more efficient than **Proposition 4**.

Table K Results of vertical queue experiments using **Propositions 4** and **5**.

| No. | $r$ | V/C | $k$    | Proposition 4 (s) | Proposition 5 (s) |
|-----|-----|-----|--------|-------------------|-------------------|
| 1   | 15  | 0.3 | [0,10] | 0.351             | 0.027             |
|     |     |     | [0,13] | 50.614            | 0.062             |
|     |     |     | [0,15] | 2045.923          | 0.113             |
| 2   | 15  | 0.5 | [0,10] | 0.349             | 0.026             |
|     |     |     | [0,13] | 50.867            | 0.063             |
|     |     |     | [0,15] | 2046.345          | 0.113             |
| 3   | 15  | 0.7 | [0,10] | 0.353             | 0.028             |
|     |     |     | [0,13] | 51.284            | 0.063             |
|     |     |     | [0,15] | 2047.389          | 0.116             |
| 4   | 30  | 0.3 | [0,10] | 0.350             | 0.027             |
|     |     |     | [0,13] | 50.589            | 0.065             |
|     |     |     | [0,15] | 2045.940          | 0.113             |
| 5   | 30  | 0.5 | [0,10] | 0.353             | 0.028             |
|     |     |     | [0,13] | 50.682            | 0.064             |
|     |     |     | [0,15] | 2045.356          | 0.112             |
| 6   | 30  | 0.7 | [0,10] | 0.349             | 0.027             |
|     |     |     | [0,13] | 50.489            | 0.063             |
|     |     |     | [0,15] | 2045.334          | 0.118             |
| 7   | 45  | 0.3 | [0,10] | 0.349             | 0.027             |
|     |     |     | [0,13] | 50.540            | 0.064             |
|     |     |     | [0,15] | 2045.457          | 0.101             |
| 8   | 45  | 0.5 | [0,10] | 0.351             | 0.028             |
|     |     |     | [0,13] | 50.998            | 0.062             |
|     |     |     | [0,15] | 2046.312          | 0.112             |
| 9   | 45  | 0.7 | [0,10] | 0.350             | 0.031             |
|     |     |     | [0,13] | 50.234            | 0.064             |
|     |     |     | [0,15] | 2045.465          | 0.112             |

#### Appendix L. Calibration of PDT model based on CTL model

Let  $\xi(q, r, k\tau)$  be the abstract form of the PDT model with parameters of traffic demand  $q$ , red period  $r$ , and dissipation time  $k\tau$ . When an actual constrained queue set is considered, the PDT model is given by  $\xi(q, r', \mu k\tau)$ , where  $r' = r - \Delta$  and  $\mu = 1 - \frac{\Delta}{r}$ . Let  $N_{PDT}(\Delta)$  be the expectation of an actual constrained queue length based on the PDT model, i.e.,  $E[\xi(q, r', \mu k\tau)]$ . The objective function for the calibration of the net loss of red time  $\Delta$  is thus given by Eq. (L1), as follows:

$$\min_{\Delta} Z = \sum [N_{PDT}(\Delta) - N_{obs}]^2, \quad (\text{L1})$$

where  $N_{obs}$  is the observed average constrained queue length. Equation (L1) searches for an optimal  $\Delta$  *s. t.* the sum of squared differences between the expected actual constrained queue length and the observed constrained queue length. The optimal  $\Delta$  can be obtained via a simple line search.

Based on the simulation data presented in Section 5.4, the optimal  $\Delta$  was found to be 5.048 s. Thus, the calibrated PDT model based on the CTL model was  $\xi \left[ (q, r - 5.048, (1 - \frac{5.048}{r})k\tau) \right]$ .

### Appendix M. Calibration of the CDT model based on the CTL model

Let  $N_{CDT}(\Delta)$  be the average actual constrained queue length based on the CDT model. Then, from Eq. (31),

$$N_{CDT}(\Delta) = \frac{sq(r-\Delta)}{s-q}. \quad (M1)$$

Similar to **Appendix L**, an objective function for the calibration of the net loss of red time  $\Delta$  is formulated as the minimization of the sum of squared differences between the average actual constrained queue length and the observed constrained queue length, as follows:

$$\min_{\Delta} Z = \sum [N_{CDT}(\Delta) - N_{obs}]^2, \quad (M2)$$

By setting  $\partial Z / \partial \Delta = 0$ ,

$$\frac{\partial Z}{\partial \Delta} = - \sum 2 \left( \frac{sq(r-\Delta)}{s-q} - N_{obs} \right) \frac{sq}{s-q} = 0. \quad (M3)$$

It follows that

$$\Delta = \frac{\sum \frac{sq}{s-q} \left( \frac{sq r}{s-q} - N_{obs} \right)}{\sum \left( \frac{sq}{s-q} \right)^2}. \quad (M4)$$

Based on the simulation data presented in Section 5.4, the optimal  $\Delta$  was found to be 7.270 s. Thus, the calibrated CDT model based on the CTL model was  $N_{CDT} = \frac{sq(r-7.270)}{s-q}$ .

### Appendix N. Estimations of real-time delays

This appendix provides a method of estimating delays in real time for two approaches joining at an intersection controlled by a simplified red–green–amber signal structure. To simplify the delay estimation, it was assumed that vehicle arrivals followed uniform distributions and no residual vehicles

carried over. Using simple geometry, the predicted delays in cycle  $i+1$  for approaches 1 and 2,  $D_{i+1,1}$  and  $D_{i+1,2}$ , were estimated as

$$D_{i+1,1} = \begin{cases} \frac{s\tilde{q}_{i+1,1}r_{i+1,1}^2}{2(s-\tilde{q}_{i+1,1})} & \text{if } \tilde{q}_{i+1,1} \leq \frac{sg_{i+1,1}}{C} \\ \frac{\tilde{q}_{i+1,1}r_{i+1,1}^2 + g_{i+1,1}[\tilde{q}_{i+1,1}(2C - g_{i+1,1}) - sg_{i+1,1}]}{2} & \text{if } \tilde{q}_{i+1,1} > \frac{sg_{i+1,1}}{C} \end{cases}, \quad (\text{N1})$$

$$D_{i+1,2} = \begin{cases} \frac{1}{2}(2L_{i+1,2} + \tilde{q}_{i+1,2}r_0)r_0 + \frac{(\tilde{q}_{i+1,2}r_{i+1,2})^2}{2(s-\tilde{q}_{i+1,2})} + \frac{1}{2}\tilde{q}_{i+1,2}(r_{i+1,2} - r_0)^2 & \text{if } \tilde{q}_{i+1,2} \leq \frac{sg_{i+1,2} - L_{i+1,2}}{r_0 + g_{i+1,2}} \\ \frac{1}{2}(2L_{i+1,2} + \tilde{q}_{i+1,2}C)C - \frac{1}{2}(2C - g_{i+1,2} - 2r_0)sg_{i+1,2} & \text{if } \tilde{q}_{i+1,2} > \frac{sg_{i+1,2} - L_{i+1,2}}{r_0 + g_{i+1,2}} \end{cases}, \quad (\text{N2})$$

where  $r_{i+1,j}$  and  $g_{i+1,j}$  are respectively the effective red and effective green in cycle  $i + 1$  on approach  $j$ ;  $\tilde{q}_{i+1,j}$  is the predicted real-time average arrival rate in cycle  $i + 1$  on approach  $j$  and  $\tilde{q}_{i+1,j} = M_{i,j}/C$ ;  $s$  is the saturation flow rate;  $C$  is the cycle length;  $r_0$  is the clearance loss time comprising a portion of the amber period and the all-red clearance time (which was 4 seconds in this case); and  $L_{i+1,2} = \tilde{q}_{i+1,2}(r_{i,2} - r_0)$ .
